# Supplementary material
Source: PubMed Central journal article supplement (PMC2819229)
Supplement: NIHMS172119-supplement-01.pdf [file NIHMS172119-supplement-01.pdf]

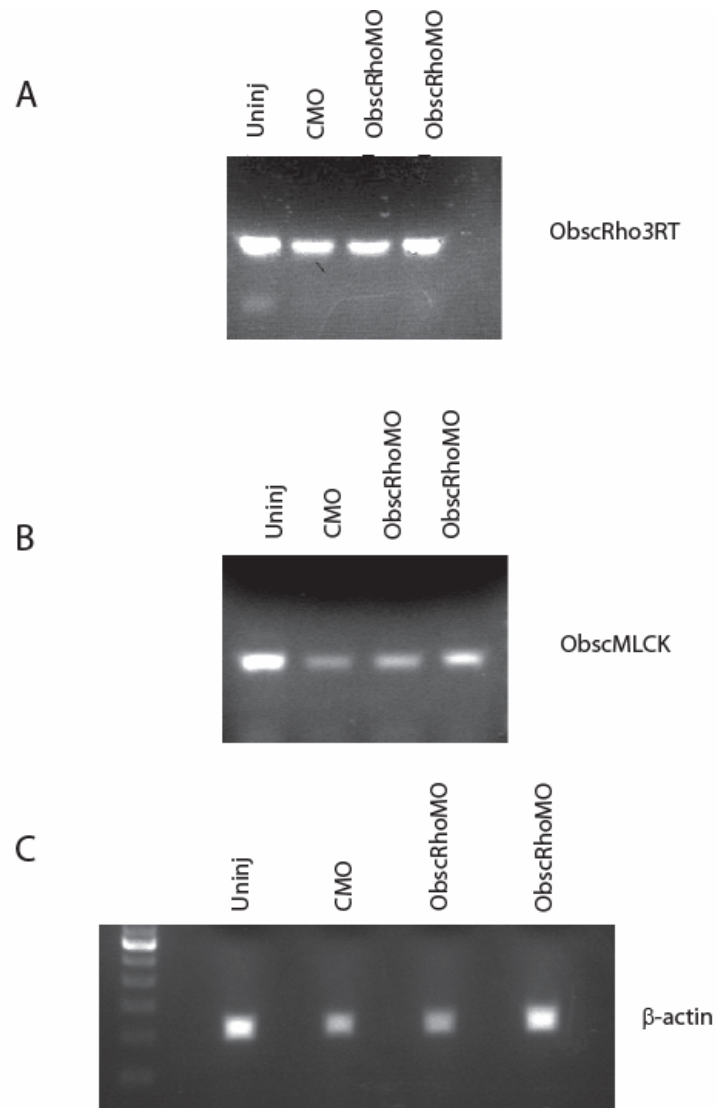

Supplemental Figure: RT-PCR of analysis of RNA isolated from 48 hpf uninjected (Uninj), control morpholino-injected (CMO) and obscurin RhoGEF morpholino-injected (ObscRhoMO) embryos. (A) Amplification using primers for the 3' end of the obscurin A transcript demonstrates intact expression of the transcript 3' to the targeted exon. (B) Amplification of the obscurin B transcript indicates that the transcript is intact but not appreciably upregulated in response to obscurin A RhoGEF antisense targeting. (C)  $\beta$ -actin amplification is shown for comparison.
