# Supplementary material
Source: PubMed Central journal article supplement (PMC2819229)
Supplement: NIHMS172119-supplement-02.pdf [file NIHMS172119-supplement-02.pdf]

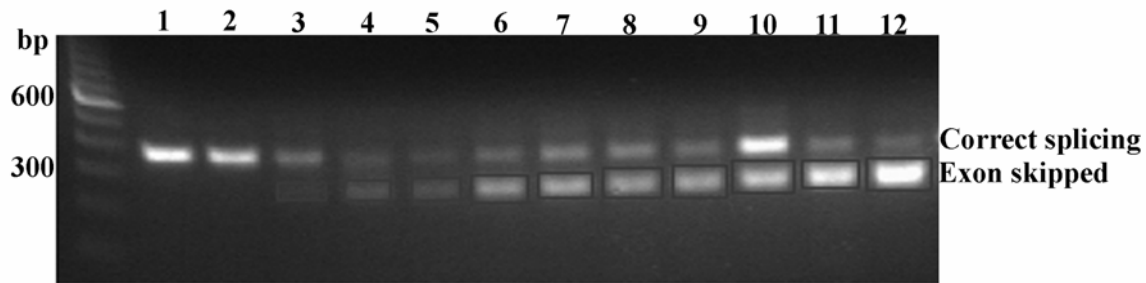

**1-** 0.2mM Control; **2-** 0.4 mM Control; **3-** 0.2 mM Rho Ex-Int MO; **4-** 0.4 mM Rho Ex-Int MO; **5 , 6, 7, 8-** 0.2 mM Rho Int-Ex MO; **9 and 10-** 0.4 mM Rho Int-Ex MO; **11-** 0.1 mM Rho Ex-Int MO + 0.1 mM Rho Int-Ex MO; **12-** 0.2 mM Rho Ex-Int MO + 0.2 mM Rho Int-Ex MO.

**Table 1. Efficiency of obscurin RhoGEF Morpholinos injected individually and together**

| Sample | Correctly Spliced Product            |                  | Exon Skipped Product                 |                  |
|--------|--------------------------------------|------------------|--------------------------------------|------------------|
|        | Density (Intensity/mm <sup>2</sup> ) | Number of Pixels | Density (Intensity/mm <sup>2</sup> ) | Number of Pixels |
| 1      | 1989                                 | 336              | -                                    | -                |
| 2      | 1590                                 | 360              | -                                    | -                |
| 3      | 1012                                 | 232              | 611                                  | 224              |
| 4      | 845                                  | 243              | 888                                  | 243              |
| 5      | 844                                  | 280              | 920                                  | 300              |
| 6      | 1112                                 | 234              | 1571                                 | 308              |
| 7      | 1360                                 | 330              | 1755                                 | 308              |
| 8      | 1455                                 | 252              | 1774                                 | 270              |
| 9      | 1343                                 | 234              | 1909                                 | 260              |
| 10     | 2315                                 | 360              | 2182                                 | 330              |
| 11     | 1406                                 | 225              | 2256                                 | 464              |
| 12     | 1215                                 | 189              | 2268                                 | 544              |
